# Supplementary material for: The protective role of autophagy in experimental osteoarthritis, and the therapeutic effects of Torin 1 on osteoarthritis by activating autophagy
Source: BMC Musculoskelet Disord. 2016 Apr 6;17:150. doi: 10.1186/s12891-016-0995-x (PMC4823842; doi:10.1186/s12891-016-0995-x)
Supplement: Additional file 3: — TIMP-1R2. (XLSX 10 kb) [file 12891_2016_995_MOESM3_ESM.xlsx]

## Sheet: Sheet1
Group	Mean	SD
Control	1	0
IL-1β	0.667	0.04564
IL-1β+Torin 1	0.811	0.04813
IL-1β+3-MA	0.52033	0.05698
