# Supplementary material for: The protective role of autophagy in experimental osteoarthritis, and the therapeutic effects of Torin 1 on osteoarthritis by activating autophagy
Source: BMC Musculoskelet Disord. 2016 Apr 6;17:150. doi: 10.1186/s12891-016-0995-x (PMC4823842; doi:10.1186/s12891-016-0995-x)
Supplement: Additional file 6: — The Mankin ScoresR2. (XLSX 10 kb) [file 12891_2016_995_MOESM6_ESM.xlsx]

## Sheet: Sheet1
Group	Mean	SD
Control	0.6667	0.5164
Collagenase	10.3333	1.0328
Collagenase+Torin 1	5.1667	0.75277
Collagenase+3-MA	13	0.63246
