# Supplementary material for: The protective role of autophagy in experimental osteoarthritis, and the therapeutic effects of Torin 1 on osteoarthritis by activating autophagy
Source: BMC Musculoskelet Disord. 2016 Apr 6;17:150. doi: 10.1186/s12891-016-0995-x (PMC4823842; doi:10.1186/s12891-016-0995-x)
Supplement: Additional file 7: — Beclin-1 in rabbit OA modelR2. (XLSX 10 kb) [file 12891_2016_995_MOESM7_ESM.xlsx]

## Sheet: Sheet1
Group	Mean	SD
Control	1.36664	0.16135
Collagenase	0.84077	0.09498
Collagenase+Torin 1	1.15	0.05088
Collagenase+3-MA	0.64323	0.07575
